# Supplementary material for: Using Machine Learning to Predict Obesity Based on Genome-Wide and Epigenome-Wide Gene–Gene and Gene–Diet Interactions
Source: Front Genet. 2022 Jan 3;12:783845. doi: 10.3389/fgene.2021.783845 (PMC8763388; doi:10.3389/fgene.2021.783845)
Supplement: Supplementary file 2 [file Table1.XLSX]

## Sheet: Suppl Table 1
Suppl Table 1. GMDR-selected features for predicting BMI.
Feature	Type	Chromosome	Position (GRCh37/hg19)	Clumpped Loci	HGNC nearest Gene	Study (PMID) and Phenotype
cg21815220	CpG	1	1150410		TNFRSF4	31510868 BMI
cg23036947	CpG	1	1294018		MXRA8
cg24886710	CpG	1	6232001	M1	CHD5
cg16519705	CpG	1	6240038	M1	CHD5
cg02388500	CpG	1	7294218		CAMTA1
cg00258316	CpG	1	8194341		NA
rs1751670	SNP	1	9158765		SLC2A5
rs3737669	SNP	1	9164133		GPR157
cg12657380	CpG	1	9795590		CLSTN1
cg13374225	CpG	1	10093824		UBE4B
cg05946513	CpG	1	15467616		C1orf126
cg23913963	CpG	1	17766917		RCC2
cg22942704	CpG	1	20813574		CAMK2N1
cg08540100	CpG	1	23888986		NA	25935004, 29099282
cg05649922	CpG	1	27029290		ARID1A
cg25614889	CpG	1	27247775		NUDC
cg12484113	CpG	1	27898757		AHDC1	25935004, 28002404, 28095459, 29278407 BMI, waist circumference
cg17164905	CpG	1	27931310		AHDC1
cg17822325	CpG	1	31896462		SERINC2	29099282, 29278407 BMI, waist circumference
cg15789095	CpG	1	32281466		SPOCD1
cg10708898	CpG	1	35309303		NA
cg06785060	CpG	1	42180981		HIVEP3
cg11075745	CpG	1	43205976		CLDN19
cg04355435	CpG	1	43736290		TMEM125
cg13392029	CpG	1	44400749		ARTN
cg03386595	CpG	1	48194304		NA
cg01019362	CpG	1	53163908		C1orf163
cg08970446	CpG	1	53608262		SLC1A7
cg17901584	CpG	1	55353706		DHCR24	25935004, 28002404, 28095459, 29278407, 29762635 BMI, waist circumference
rs778382	SNP	1	56635806	S1	PLPP3
rs947255	SNP	1	56689336	S1	PLPP3
rs706369	SNP	1	56690319	S1	PLPP3
rs4927308	SNP	1	56700374	S1	PLPP3
rs778403	SNP	1	56702613	S1	PLPP3
rs778404	SNP	1	56702785	S1	PLPP3
rs2792773	SNP	1	56703396	S1	PLPP3
rs778405	SNP	1	56703413	S1	PLPP3
cg22901840	CpG	1	68512777		DIRAS3
cg21452766	CpG	1	70877088		CTH
cg11963676	CpG	1	76540110		ST6GALNAC3
cg16046833	CpG	1	99136054		SNX7
rs6702126	SNP	1	99199954	S2	SNX7
rs12122369	SNP	1	99285559	S2	SNX7
rs11166123	SNP	1	99288005	S2	SNX7
rs4908099	SNP	1	99326665	S2	NA
cg13499923	CpG	1	108594260		NA
cg07423155	CpG	1	110527259		AHCYL1
cg16773028	CpG	1	111148339		KCNA2
cg16246545	CpG	1	120255941	M2	PHGDH	28002404, 29278407 BMI
cg14476101	CpG	1	120255992	M2	PHGDH	26110892, 28002404, 28095459, 29278407 BMI
cg16501235	CpG	1	150245988		C1orf54
cg16013543	CpG	1	154300241		ATP8B2
cg24337215	CpG	1	155881944		RIT1
cg17025683	CpG	1	173836220		GAS5;SNORD76;SNORD75
rs12757065	SNP	1	179344191		AXDND1
rs4314854	SNP	1	191281992		BRINP3
cg10098523	CpG	1	200002343		NR5A2
cg00003287	CpG	1	201346149		TNNT2
cg01455178	CpG	1	205648187		SLC45A3	28095459 BMI
cg09786013	CpG	1	220864119		C1orf115
cg00926874	CpG	1	226309722		NA
rs3014256	SNP	1	227525183		CDC42BPA
cg19030814	CpG	1	232600205		SIPA1L2
cg04292187	CpG	1	235668421		B3GALNT2
cg02578321	CpG	1	247275872		C1orf229
cg08216099	CpG	2	1725761		PXDN
cg20247911	CpG	2	2124618		MYT1L
rs2668823	SNP	2	2363052		MYT1L
cg13884879	CpG	2	9540759		ASAP2
cg15496063	CpG	2	10220802		CYS1
cg10890199	CpG	2	23607182		KLHL29
cg07028598	CpG	2	33832460		NA
cg02342092	CpG	2	44314396		NA
rs13010324	SNP	2	58827154	S3	FANCL	17903300 BMI
rs10490089	SNP	2	58842930	S3	FANCL	17903300 BMI
cg19017142	CpG	2	64431245		NA	28095459, 29278407 BMI
cg26376241	CpG	2	65594021		SPRED2	29278407 BMI
cg27119740	CpG	2	67509609		NA
cg21076680	CpG	2	69135655		NA
cg20651995	CpG	2	69525471		NA
cg08245702	CpG	2	71127349		VAX2
cg24230340	CpG	2	74758080		HTRA2;AUP1
cg27337894	CpG	2	85359745		TCF7L1
cg01660827	CpG	2	97486072		CNNM3
cg16851423	CpG	2	98350669		ZAP70
cg08026735	CpG	2	98703888		VWA3B
cg14902389	CpG	2	99342685		MGAT4A	28002404 BMI
cg17264609	CpG	2	105051018		LOC150568
cg27421353	CpG	2	105949440		NA
rs11123244	SNP	2	115245383	S4	DPP10
rs1430116	SNP	2	115246340	S4	DPP10
cg02994216	CpG	2	121010979		RALB
rs296042	SNP	2	123575993	S5	TSN
rs296034	SNP	2	123602800	S5	TSN
rs294643	SNP	2	123614913	S5	TSN
cg15584070	CpG	2	129439854		NA
cg15633107	CpG	2	132112240		NA
cg04284463	CpG	2	154335766		RPRM
cg18477797	CpG	2	166215248		SCN2A
rs11679527	SNP	2	167393107		SCN7A
cg25004193	CpG	2	174889675		NA
cg06145336	CpG	2	177027931		HOXD3
cg26191447	CpG	2	191656418		NA	28095459 BMI
rs700680	SNP	2	198707950	S6	PLCL1
rs700688	SNP	2	198723833	S6	PLCL1
rs1436131	SNP	2	198731230	S6	PLCL1
rs1865586	SNP	2	198758868	S6	PLCL1
rs35730302	SNP	2	198818626	S6	PLCL1
cg21990144	CpG	2	201726666		CLK1
cg20402579	CpG	2	216973943		XRCC5
cg21023831	CpG	2	218769784		TNS1
cg04726824	CpG	2	219435282		RQCD1
cg14074251	CpG	2	220299116		SPEG
cg19240090	CpG	2	229173193		NA
cg26847438	CpG	2	231191916		SP140L
cg12001357	CpG	2	233410852		CHRNG	28095459, 29278407 BMI
cg17356718	CpG	2	240230587		HDAC4
cg01813672	CpG	2	240876920		NA
cg18896979	CpG	2	242844174		NA
cg21415385	CpG	3	11604056		VGLL4
cg27121661	CpG	3	16525721		RFTN1
cg05673892	CpG	3	38033934		VILL
cg17552869	CpG	3	42244001		TRAK1
cg20202413	CpG	3	46923068		PTH1R
cg14861047	CpG	3	48657326		NA
cg21837569	CpG	3	50126067		RBM5
cg23021329	CpG	3	52256186		TLR9
rs10470577	SNP	3	68873985		FAM19A4	17903300 body weight
cg10226952	CpG	3	75668369		NA
rs4260455	SNP	3	83921894		CADM2	17903300 body weight
rs9815950	SNP	3	99365865	S7	COL8A1	17903300 body weight
rs9821695	SNP	3	99367163	S7	COL8A1	17903300 body weight
cg15564428	CpG	3	101498201		FAM55C
rs978699	SNP	3	101753995	S8	ZPLD1
rs12636293	SNP	3	101756540	S8	ZPLD1
rs12633801	SNP	3	101756688	S8	ZPLD1
rs6791614	SNP	3	101757448	S8	ZPLD1
rs7625531	SNP	3	101758350	S8	ZPLD1
cg12992827	CpG	3	101901234		NA	25935004, 28002404, 31510868 BMI
rs7628767	SNP	3	103400082		ZPLD1
rs643938	SNP	3	107354130		BBX
cg16006965	CpG	3	111852325		GCET2
cg16211438	CpG	3	113560972		GRAMD1C
cg20126521	CpG	3	131221830		MRPL3
cg12478370	CpG	3	135631071		NA
cg02567756	CpG	3	137906401		ARMC8
rs9832534	SNP	3	140047121		CLSTN2
cg15034393	CpG	3	152856773		NA
cg18098839	CpG	3	167742700		GOLIM4	28002404, 28095459, 29278407 BMI
cg00815198	CpG	3	170498460		NA
rs7638292	SNP	3	171146484		TNIK
cg24415922	CpG	4	858814		GAK
cg03799405	CpG	4	1595726		NA
cg09371344	CpG	4	1828603		LETM1
cg15602102	CpG	4	3735966		NA
cg03160466	CpG	4	4229061		OTOP1
cg02514022	CpG	4	4391898		D4S234E
rs6446627	SNP	4	7830974		AFAP1
rs1378343	SNP	4	15112646		CPEB2
cg20327324	CpG	4	24590014		NA
rs4974985	SNP	4	38961449		TMEM156
rs4861237	SNP	4	42914640		GRXCR1
rs992133	SNP	4	42960668	S9	GRXCR1
rs10938230	SNP	4	43025255	S9	GRXCR1
rs10938235	SNP	4	43049245	S9	GRXCR1
rs720961	SNP	4	43054657	S9	GRXCR1
rs6855602	SNP	4	43058964	S9	GRXCR1
rs1595187	SNP	4	43066737	S9	GRXCR1
cg13563026	CpG	4	47512538		ATP10D
cg03359731	CpG	4	48833388		OCIAD1
cg19409381	CpG	4	83351505		ENOPH1;HNRPDL
cg15448990	CpG	4	88411497		SPARCL1
cg09168222	CpG	4	89299733		HERC6
cg03925149	CpG	4	96761135		PDHA2
cg08103568	CpG	4	100737138		DAPP1
cg18626035	CpG	4	103998293		NHEDC2
cg20693608	CpG	4	113152836		AP1AR
rs1081010	SNP	4	114732529		CAMK2D
cg11149566	CpG	4	129260147		NA
cg06690548	CpG	4	139162808		SLC7A11	26798409, 28002404, 28095459, 29099282,29278407 BMI, waist circumference, hypertriglyceridemic waist
cg04761746	CpG	4	141177756		SCOC
rs6849151	SNP	4	153668482		TIGD4
cg05119988	CpG	4	166251189		SC4MOL	28095459, 29278407 BMI
cg26722769	CpG	4	170328730		NEK1
rs12642493	SNP	4	181933056		TENM3
cg12896146	CpG	4	187477065		MTNR1A
cg27196131	CpG	4	188097683		NA
cg23006040	CpG	4	188528319		NA
cg20962974	CpG	5	1515837		LPCAT1
rs1601641	SNP	5	1987633		IRX4
cg18100702	CpG	5	3600572		IRX1
cg18330338	CpG	5	9047211		SEMA5A	31510868 BMI
rs32269	SNP	5	11197322		CTNND2
rs7728074	SNP	5	25575577		CDH10
cg11275487	CpG	5	37836119		GDNF
rs4866954	SNP	5	42747162	S10	CCDC152
rs12054838	SNP	5	42750177	S10	CCDC152
rs12519443	SNP	5	42819921	S10	SEPP1
cg08818297	CpG	5	44911232		NA
cg12827601	CpG	5	73196969		RGNEF
rs168534	SNP	5	82004716	S11	XRCC4
rs355285	SNP	5	82008501	S11	XRCC4
rs10462415	SNP	5	84004601		EDIL3
cg12585331	CpG	5	92904377		FLJ42709
rs6877870	SNP	5	95882017		CAST
cg20402000	CpG	5	107007640		EFNA5
cg04659396	CpG	5	131806593		NA
cg16151960	CpG	5	133890280		PHF15
cg05171952	CpG	5	134365520		PITX1
cg07489502	CpG	5	140811642		PCDHGB5;PCDHGA10
rs7721447	SNP	5	143208050		HMHB1
cg17009869	CpG	5	148929010		CSNK1A1
cg18764008	CpG	5	151101114		NA
rs9313941	SNP	5	155896817		SGCD
cg26403843	CpG	5	158634085		RNF145	25935004, 26119815, 26798409, 28002404, 28095459, 29278407 BMI, waist circumference, hypertriglyceridemic waist
cg12586050	CpG	5	159797922		C1QTNF2
cg19728382	CpG	5	172757276		STC2
rs7715876	SNP	5	173526714	S12	NA
rs4457100	SNP	5	173534877	S12	NA
cg18034719	CpG	5	176860863		GRK6
cg19978312	CpG	5	179634688		RASGEF1C
cg22590032	CpG	5	180050565		FLT4	28002404 BMI
cg04018288	CpG	6	1383533		NA
cg21498062	CpG	6	21157865		CDKAL1
cg19513374	CpG	6	28962971		ZNF311
cg07653289	CpG	6	30325734		NA
cg05201185	CpG	6	30459139		HLA-E
cg08677140	CpG	6	30582241		PPP1R10
cg12475182	CpG	6	30876795		GTF2H4
cg17857094	CpG	6	30907280		DPCR1
cg00334245	CpG	6	30923446		NA
cg12397188	CpG	6	31144068		PSORS1C3
cg19818722	CpG	6	31549262		LTB
cg24275356	CpG	6	32942541		BRD2
cg11411509	CpG	6	33157746		COL11A2
cg14473643	CpG	6	33282885		TAPBP;ZBTB22
cg15264710	CpG	6	33396168		SYNGAP1
cg04704449	CpG	6	33738291		NA
cg02108340	CpG	6	33866781		NA
cg22797644	CpG	6	34206491		HMGA1
cg07843056	CpG	6	35656848		FKBP5
cg01599742	CpG	6	39902533		MOCS1
rs10947996	SNP	6	41892809		BYSL
cg22756655	CpG	6	42715412		NA
cg06560379	CpG	6	44231305	M3	NFKBIE	28002404, 29278407, 31510868 BMI
cg07831644	CpG	6	44238413	M3	TMEM151B
cg02213340	CpG	6	74230767		EEF1A1
cg18905161	CpG	6	84742998		MRAP2
cg09965967	CpG	6	86303767		SNX14
rs2655634	SNP	6	92021630	S13	MAP3K7	17903300 BMI
rs2811662	SNP	6	92029854	S13	MAP3K7	17903300 BMI
rs9399724	SNP	6	95891910		MANEA	17903300 BMI
rs17456339	SNP	6	104765822		HACE1	17903300 BMI
cg09236658	CpG	6	108485152		NA
cg00615550	CpG	6	109703901		CD164
cg14413700	CpG	6	119470389		FAM184A
cg18647745	CpG	6	146916145		NA
cg16341269	CpG	6	150213172		RAET1E
cg23165623	CpG	6	152128411	M4	ESR1
cg11251858	CpG	6	152129036	M4	ESR1
cg11520719	CpG	6	157391679		ARID1B
cg13068216	CpG	6	158733981		TULP4
cg17513325	CpG	6	166892216		RPS6KA2
cg17501210	CpG	6	166970252		RPS6KA2	26119815, 28002404, 28095459, 29278407, 31510868 BMI
cg18744360	CpG	7	1912602		MAD1L1
cg10145585	CpG	7	2443058		CHST12
cg18285681	CpG	7	2728841		AMZ1
cg18395354	CpG	7	3801491		SDK1
cg11998932	CpG	7	3901843		SDK1
cg13906049	CpG	7	4837925		NA
cg11684826	CpG	7	6055582		AIMP2
cg06200611	CpG	7	6414209		RAC1
cg03284102	CpG	7	10980944		NDUFA4
cg04028315	CpG	7	21467710		SP4
cg06166490	CpG	7	27143334		HOXA2
cg23454797	CpG	7	27183990		HOXA5
cg19390658	CpG	7	30636176		GARS	29278407 BMI
cg15754660	CpG	7	34699393		NPSR1
cg00945735	CpG	7	41982767		NA
cg03324947	CpG	7	42971765		MRPL32;PSMA2
cg12876261	CpG	7	56119223		PSPH;CCT6A
cg16743754	CpG	7	57328785		NA
cg02311378	CpG	7	64023522		ZNF680
cg17871993	CpG	7	65673056		TPST1
rs13226602	SNP	7	86222547	S14	GRM3
rs802441	SNP	7	86287103	S14	GRM3
rs11489497	SNP	7	89533047		STEAP1
cg14997707	CpG	7	93853120		NA
cg10997627	CpG	7	97363080		TAC1
cg12565057	CpG	7	100482617		SRRT
cg12315284	CpG	7	101936318		SH2B2
cg04590284	CpG	7	102105201		ALKBH4;LRWD1
cg24413054	CpG	7	106302117		FLJ36031
cg13606592	CpG	7	121895636		NA
cg26278103	CpG	7	124404244		GPR37
cg15802323	CpG	7	127228142		ARF5
rs6960767	SNP	7	129942917		CPA4
cg06596689	CpG	7	139875956		LOC100134229;JHDM1
cg01832012	CpG	7	144437395		TPK1
cg19080839	CpG	7	150939592		SMARCD3
cg08403994	CpG	7	151129211		CRYGN
cg25320562	CpG	7	152133073		MLL3;FABP5L3
rs6948866	SNP	7	152773224		ACTR3B
cg16558485	CpG	7	155757295		NA
cg00841693	CpG	7	156803122		MNX1
cg08186965	CpG	8	2133250		NA
rs41470346	SNP	8	4421394		CSMD1
cg09862711	CpG	8	5003384		NA
rs7004340	SNP	8	6175712		MCPH1
rs6586897	SNP	8	20035399	S15	SLC18A1
rs1908809	SNP	8	20036043	S15	SLC18A1
cg03572859	CpG	8	22409634		SORBS3
cg05244581	CpG	8	25315002		KCTD9
cg21437157	CpG	8	27346608		NA
cg02043791	CpG	8	38322629		FGFR1
cg02571142	CpG	8	42234803		DKK4	28095459, 29278407 BMI
cg02508743	CpG	8	56903623		LYN	31510868 BMI
cg15711246	CpG	8	62702873		NA
cg20047489	CpG	8	65292217		NA
cg05782888	CpG	8	75087963		NA	31510868 BMI
rs13258743	SNP	8	78325636		PEX2
rs1549463	SNP	8	81079779		TPD52
rs10103568	SNP	8	88696839		DCAF4L2
cg05033271	CpG	8	89340069		MMP16
cg24029096	CpG	8	95037391		NA
cg11192808	CpG	8	101170185		SPAG1
rs2022976	SNP	8	107401813		OXR1
rs4871825	SNP	8	121034642	S16	DEPTOR
rs1519812	SNP	8	121045227	S16	DEPTOR
cg25825810	CpG	8	124730225		ANXA13
rs7828662	SNP	8	127692210		FAM84B
rs1441991	SNP	8	130006158	S17	GSDMC
rs10110974	SNP	8	130009787	S17	GSDMC
rs1372454	SNP	8	130030130	S17	GSDMC
rs4266613	SNP	8	130063723	S17	GSDMC
cg21602518	CpG	8	134394900		NA
rs10109084	SNP	8	138773403	S18	FAM135B
rs10109199	SNP	8	138773501	S18	FAM135B
rs9285631	SNP	8	138774514	S18	FAM135B
cg03405983	CpG	8	143858548		LYNX1
cg22328616	CpG	8	145133488		EXOSC4
cg04044206	CpG	8	146227573	M5	C8orf77;ZNF252
cg01049274	CpG	8	146228340	M5	C8orf77;ZNF252
rs9969780	SNP	9	2614294		VLDLR
cg14628274	CpG	9	19424228		ACER2
rs11999411	SNP	9	32333058		ACO1	17903300 BMI
rs10217794	SNP	9	79369163		PRUNE2
cg21223016	CpG	9	79392434		PRUNE2;PCA3
cg13952031	CpG	9	101706041		COL15A1
cg04759982	CpG	9	117265427		DFNB31
cg13724827	CpG	9	126030353		STRBP
cg14044707	CpG	9	132628998		USP20
cg14377416	CpG	9	136700102		VAV2
cg14477471	CpG	9	137107162		NA
cg26581729	CpG	9	139939792		NPDC1
cg01020035	CpG	10	682152		DIP2C
cg18346182	CpG	10	734399		DIP2C
cg19695507	CpG	10	13526193		BEND7	28002404, 29278407, 31510868 BMI
cg00134210	CpG	10	14644132		FAM107B	29099282 BMI, waist circumference
cg06460869	CpG	10	17270094		VIM
rs4631777	SNP	10	20440397	S19	PLXDC2	17903300 BMI
rs7896864	SNP	10	20443553	S19	PLXDC2	17903300 BMI
cg05913198	CpG	10	21822977		MLLT10
cg06100684	CpG	10	23383753		MSRB2
cg16228323	CpG	10	43818243		NA
rs7911568	SNP	10	57179456	S20	PCDH15	17903300, 20966902 body weight
rs7895623	SNP	10	57180540	S20	PCDH15	17903300, 20966902 body weight
cg04582365	CpG	10	59155846		NA
rs11006258	SNP	10	60538659		BICC1
cg00360414	CpG	10	63213391		TMEM26
rs10995238	SNP	10	64387108	C1	ZNF365
cg03961010	CpG	10	64397487	C1	ZNF365
rs10509380	SNP	10	78855360		KCNMA1
rs7900225	SNP	10	89583792		ATAD1
rs7084327	SNP	10	91883796		KIF20B
cg07504977	CpG	10	102131012		NA	26110892, 28002404, 28095459 BMI, waist circumference
cg26955383	CpG	10	105218660		CALHM1	28095459, 29278407, 31510868 BMI
cg12477923	CpG	10	105365600		SH3PXD2A
rs1496077	SNP	10	107681935	S21	SORCS1
rs1496080	SNP	10	107682231	S21	SORCS1
rs2683666	SNP	10	107683958	S21	SORCS1
rs2683672	SNP	10	107690520	S21	SORCS1
rs577828	SNP	10	107699448	S21	SORCS1
rs568161	SNP	10	107701989	S21	SORCS1
rs541328	SNP	10	107710583	S21	SORCS1
rs572652	SNP	10	107718932	S21	SORCS1
cg11035304	CpG	10	112096355		NA
cg23650686	CpG	10	113913080		GPAM
cg25290227	CpG	10	113944114		GPAM
cg07269053	CpG	10	114497611		VTI1A
cg24971384	CpG	10	118083918		C10orf96
cg18621256	CpG	10	119221444		NA
cg22573650	CpG	10	126602519		NA
cg09621603	CpG	10	128210076		C10orf90
rs10765124	SNP	10	129286181		NPS
cg00238353	CpG	10	129785537		PTPRE	28002404 BMI
cg05583676	CpG	10	132461246		NA
cg07934812	CpG	10	133109013		TCERG1L
cg24198990	CpG	10	134035149		STK32C
cg15834395	CpG	10	134261413		C10orf91
cg09838169	CpG	10	134377481		INPP5A
cg07052041	CpG	10	135092104		NA	31510868 BMI
cg10927968	CpG	11	1807333		NA	25935004, 28002404, 29278407 BMI, waist circumference
cg27331871	CpG	11	2171478		IGF2;INS-IGF2
cg11788486	CpG	11	4566169		OR52M1
cg09140665	CpG	11	7960899		OR10A3
cg02346563	CpG	11	8084670		TUB
cg17061862	CpG	11	9590431		NA	27826092, 31510868 BMI
cg03354554	CpG	11	9781412		NA
rs6484897	SNP	11	11445303		GALNT18
cg02212009	CpG	11	12820860		TEAD1
cg01823718	CpG	11	24015048		NA
rs17309405	SNP	11	26766550	S22	SLC5A12
rs17243657	SNP	11	26766643	S22	SLC5A12
cg07784428	CpG	11	30033960		KCNA4
rs2476456	SNP	11	33462299		KIAA1549L
cg23155006	CpG	11	33795595		FBXO3
cg03807883	CpG	11	36535685		NA
cg24427992	CpG	11	43599355		NA
cg10503202	CpG	11	46354635		DGKZ
cg16692211	CpG	11	46727036		ZNF408
cg02375166	CpG	11	58291656		NA
cg04046629	CpG	11	60775831		CD6
cg12296079	CpG	11	61849674		NA
cg01861825	CpG	11	62693818		NA
cg23069847	CpG	11	64067868		C11orf20
cg18757468	CpG	11	65352168		EHBP1L1
cg09466807	CpG	11	65767062		EIF1AD
cg00979223	CpG	11	67290502		CABP2
cg00574958	CpG	11	68607622	M6	CPT1A	25935004, 26110892, 26798409, 27826092, 28002404, 28095459, 29099282, 29278407, 29762635, 31510868 BMI, hypertriglyceridemic waist, waist circumference
cg17058475	CpG	11	68607737	M6	CPT1A	26798409, 28002404, 28095459, 29278407 BMI
cg01773858	CpG	11	73076892		ARHGEF17
cg18100436	CpG	11	73358107		PLEKHB1
cg21007414	CpG	11	76381687		LRRC32
cg25625514	CpG	11	76535564		NA
cg11602546	CpG	11	77705828		INTS4
cg17579825	CpG	11	79148889		ODZ4
rs7120017	SNP	11	96725721		JRKL
cg16688583	CpG	11	101001533		PGR
cg18289710	CpG	11	103811641		PDGFD
cg07748540	CpG	11	104034619		PDGFD
rs3087967	SNP	11	111156836		C11orf53
cg12947833	CpG	11	111783499		CRYAB;HSPB2
cg04537602	CpG	11	118763859		CXCR5
cg18963330	CpG	11	120081890		OAF
cg20673919	CpG	11	125702313		PATE4
cg09913813	CpG	11	126573785		KIRREL3
cg06330055	CpG	11	129564162		NA
cg18282388	CpG	11	129716470		TMEM45B	31510868 BMI
cg11691170	CpG	11	130318691		ADAMTS15
rs813146	SNP	11	131541003		NTM
rs7125232	SNP	11	134758485		NA
cg26107333	CpG	12	3310269		TSPAN9
cg10917293	CpG	12	3841539		EFCAB4B
cg19211149	CpG	12	3982353		PARP11
cg16310717	CpG	12	4383619		CCND2
rs10744682	SNP	12	5555040		NTF3
cg01313732	CpG	12	10252119		CLEC1A
rs2430605	SNP	12	12227150		BCL2L14
cg20910568	CpG	12	13396087		NA
rs7977831	SNP	12	13892408		GRIN2B
rs767201	SNP	12	15370878	S23	RERG
rs6488766	SNP	12	15374630	S23	RERG
rs12300553	SNP	12	15381210	S23	RERG
rs12578517	SNP	12	15407185	S23	RERG
rs12317636	SNP	12	15420288	S23	RERG
rs1117152	SNP	12	15438032	S23	RERG
rs10466856	SNP	12	15456242	S23	RERG
rs12306807	SNP	12	15472354	S23	RERG
rs11056429	SNP	12	15474823	S23	RERG
rs11056433	SNP	12	15497942	S23	RERG
rs11056447	SNP	12	15512044	S23	PTPRO
rs10841923	SNP	12	22169854		CMAS
cg02473866	CpG	12	28128105		NA
cg08738571	CpG	12	32655192		FGD4
cg08858160	CpG	12	34456631		NA
cg27008316	CpG	12	34753697		NA
cg07535477	CpG	12	50017486		PRPF40B
cg00474734	CpG	12	53645975		MFSD5
cg01526553	CpG	12	56554264		MYL6
cg03052632	CpG	12	57634626		NDUFA4L2
cg12113251	CpG	12	58176230		TSFM;FAM119B
rs342153	SNP	12	63158162		PPM1H	17903300 body weight
cg02123091	CpG	12	66261320		HMGA2
rs1480472	SNP	12	66412457		NA
cg07463429	CpG	12	70133063		RAB3IP
rs11104349	SNP	12	77627445		E2F7
cg05589489	CpG	12	89748821		NA
rs10858938	SNP	12	90301679	S24	ATP2B1
rs7964216	SNP	12	90396480	S24	ATP2B1
rs10777218	SNP	12	90398262	S24	ATP2B1
rs9989044	SNP	12	98518185		NA
cg08806558	CpG	12	102874972		IGF1
cg19698789	CpG	12	106473634		NUAK1
cg00174508	CpG	12	107774298		BTBD11
cg03707502	CpG	12	108957979		ISCU
cg14967768	CpG	12	118455085		RFC5
cg27262122	CpG	12	124196671		ATP6V0A2
cg18222913	CpG	12	128846838		TMEM132C
cg18439535	CpG	12	131304342		STX2
cg19483465	CpG	12	132896939		GALNT9
cg17011360	CpG	13	25620833		NA
cg08529529	CpG	13	31309799		ALOX5AP
cg22593432	CpG	13	32575905		NA
cg23584087	CpG	13	33626629		KL
cg10633648	CpG	13	35444823		NA
cg19750657	CpG	13	38935967		UFM1	28002404, 28095459, 29278407, 31510868 BMI
cg11650298	CpG	13	44690989		NA	28002404 BMI
rs1325648	SNP	13	46346557	S25	SPERT
rs9534210	SNP	13	46348057	S25	SPERT
cg00632778	CpG	13	50422122		NA
cg23128025	CpG	13	52158394		WDFY2
cg23734418	CpG	13	61221316		NA
cg25491122	CpG	13	67801551		PCDH9
cg14861497	CpG	13	73639108		KLF5
cg19050940	CpG	13	76445108		NA
cg06675375	CpG	13	79174811		POU4F1
cg19211853	CpG	13	79968216		RBM26	29278407 BMI
cg10476585	CpG	13	94499653		GPC6
cg00821604	CpG	13	99084684		FARP1
rs2493589	SNP	13	102582882		FGF14	17903300 body weight
rs1326452	SNP	13	105484735		DAOA
cg21858462	CpG	13	112628448		NA
cg12432568	CpG	13	113659625		MCF2L
cg04139567	CpG	13	113973567		LAMP1
cg01973552	CpG	13	115044379		NA
cg02180368	CpG	14	20879491		TEP1
cg05248321	CpG	14	20898128		KLHL33
cg19704070	CpG	14	23755263		HOMEZ
cg12842722	CpG	14	24712062		TINF2
cg10039281	CpG	14	24880346		NYNRIN
rs4983089	SNP	14	25882546	S26	STXBP6
rs2754076	SNP	14	25885662		STXBP6
rs2754087	SNP	14	25889339	S26	STXBP6	31669095 BMI
cg13728308	CpG	14	34532891		NA
rs11624944	SNP	14	37016789	S27	NKX2-1
rs10145174	SNP	14	37023386	S27	NKX2-8
rs10483473	SNP	14	37023492	S27	NKX2-8
rs17104686	SNP	14	37024142	S27	NKX2-8
rs10148530	SNP	14	37024488	S27	NKX2-8
rs1951166	SNP	14	37026895	S27	NKX2-8
rs10047954	SNP	14	37028046	S27	NKX2-8
rs4903224	SNP	14	37030683	S27	NKX2-8
rs7144325	SNP	14	37038310	S27	NKX2-8
rs11627968	SNP	14	37045098	S27	NKX2-8
cg24726668	CpG	14	39736238		CTAGE5
cg01097663	CpG	14	42300132		LRFN5
cg18894781	CpG	14	51955716		FRMD6
cg26672104	CpG	14	52327433		GNG2
cg08289937	CpG	14	53487123		NA
cg00917437	CpG	14	55879046		KIAA0831
rs17095488	SNP	14	59446783		DAAM1
cg12914689	CpG	14	64108752		WDR89
cg04921109	CpG	14	69952104		FLJ44817
rs8016617	SNP	14	71624290	S28	NA
rs7158714	SNP	14	71630262	S28	NA
rs4902904	SNP	14	71641556	S28	NA
cg10919522	CpG	14	74227441		C14orf43	28002404, 28095459, 29278407, 31510868 BMI
cg14249311	CpG	14	82090632		NA
cg12212555	CpG	14	90526722		KCNK13
rs7149043	SNP	14	95116292		SERPINA3
rs1950296	SNP	14	95130715	S29	SERPINA3
rs6575452	SNP	14	95145282	S29	SERPINA3
cg20574436	CpG	14	99701416		BCL11B
cg01022455	CpG	14	99814173		NA
cg24154132	CpG	14	103367632		TRAF3
cg04328703	CpG	14	104603559		KIF26A
cg21209020	CpG	14	105477645		CDCA4
cg15936935	CpG	14	105827276		PACS2
cg20809224	CpG	15	24924925		C15orf2
cg25959799	CpG	15	26791668		GABRB3
cg17967813	CpG	15	35488603		NA
rs11637020	SNP	15	39567305		C15orf54
rs7163310	SNP	15	42326259		PLA2G4E
cg16985233	CpG	15	43806249		NA
cg04521583	CpG	15	44087089		MIR1282;SERF2
cg01371498	CpG	15	49255686		SHC4
cg24507955	CpG	15	49339070		SECISBP2L
rs1032182	SNP	15	59496643		MYO1E
cg00307150	CpG	15	64243801		DAPK2
cg02594426	CpG	15	64999695		NA
cg07562100	CpG	15	68569975	M7	FEM1B
cg09272869	CpG	15	68569991	M7	FEM1B
cg22395255	CpG	15	71903974		THSD4
cg01030757	CpG	15	73866328		NPTN
cg25539979	CpG	15	74415439		NA
cg25506127	CpG	15	74907002		CLK3
cg15299233	CpG	15	75162173		SCAMP2
cg23097139	CpG	15	75918757		SNUPN
cg08766211	CpG	15	79118175		NA
cg17821321	CpG	15	79383632		RASGRF1
cg09859040	CpG	15	80743325		ARNT2
cg07728579	CpG	15	83475013		FSD2	28002404, 29278407 BMI
rs418676	SNP	15	85585157		PDE8A
rs6496055	SNP	15	86070688		AKAP13
rs4932227	SNP	15	90064593		RHCG
cg20552752	CpG	15	90895281		ZNF774
cg01321816	CpG	15	91358514		BLM
cg05740157	CpG	15	93968248		NA
rs6496076	SNP	15	95514566		MCTP2
cg16579431	CpG	16	433439		LOC100134368;TMEM8
cg08810813	CpG	16	686527		C16orf13
rs29606	SNP	16	8418047		TMEM114
cg03500056	CpG	16	8814507		ABAT	28095459, 29278407 BMI
cg08667786	CpG	16	8995677		USP7
rs2075155	SNP	16	9561316		NA
rs1465349	SNP	16	10687290		EMP2
rs209848	SNP	16	12410796		SNX29
rs8063887	SNP	16	15890017		MYH11
cg05683445	CpG	16	28303182		SBK1
cg01792666	CpG	16	30710912		SRCAP
cg09324016	CpG	16	31085582		ZNF646;ZNF668
cg27646484	CpG	16	31210736		NA
cg06207201	CpG	16	50701535		SNX20	28002404, 29278407 BMI
cg08103706	CpG	16	56713771		NA
cg27093918	CpG	16	69564625		NA
cg03346415	CpG	16	69854895		WWP2
cg27262054	CpG	16	73067525		ZFHX3
cg00908828	CpG	16	75297424		BCAR1
cg02883503	CpG	16	75423900		CFDP1
cg01652078	CpG	16	81726134		CMIP
cg08428188	CpG	16	85363174		NA
cg05744264	CpG	16	85831323		COX4NB
cg26943759	CpG	16	87100606		NA
cg03666300	CpG	16	88448381		NA
cg10426084	CpG	17	1640472		WDR81
cg25371182	CpG	17	3539597		CTNS;SHPK
cg12848098	CpG	17	5404090		LOC728392
cg24412797	CpG	17	8191814		RANGRF;SLC25A35
rs10153318	SNP	17	13325102		HS3ST3A1
rs11078296	SNP	17	15308683		TEKT3
cg04195226	CpG	17	16158686		PIGL
cg11024682	CpG	17	17730094		SREBF1	25935004, 26119815, 26798409, 28002404, 28095459, 29099282, 29278407, 29762635 BMI, waist circumference, hypertriglyceridemic waist
cg16611584	CpG	17	19809078		AKAP10	28002404, 28095459, 29278407, 31510868 BMI
cg18648632	CpG	17	21934909		NA
cg23698897	CpG	17	26362837		NA
cg13138279	CpG	17	27574645		CRYBA1
cg13341380	CpG	17	33701529		SLFN11
cg16332577	CpG	17	37886349		C17orf37
cg03078551	CpG	17	41656298		NA	25935004, 28002404, 28095459 BMI, waist circumference
cg02823457	CpG	17	47583920		NGFR
cg00594854	CpG	17	48052682		NA
cg09376537	CpG	17	48638103		CACNA1G
cg25180585	CpG	17	49230756		NME1;NME1-NME2
rs11079111	SNP	17	52297620		KIF2B
rs7220060	SNP	17	52308825		KIF2B
cg24174557	CpG	17	57903544		TMEM49	28002404, 29278407, 29762635 BMI
cg14189993	CpG	17	58155868		HEATR6
cg26244646	CpG	17	59391924		BCAS3
cg01488770	CpG	17	59474078		NA
cg08815352	CpG	17	61698753		MAP3K3
cg00498360	CpG	17	64504304		PRKCA
rs11868207	SNP	17	66675720		FAM20A
cg16323911	CpG	17	70505986		NA
cg10251641	CpG	17	73852271		WBP2
cg20785098	CpG	17	75607016		NA
cg10508317	CpG	17	76355146	M8	SOCS3	28002404, 28095459, 29278407 BMI
cg27637521	CpG	17	76355202	M8	SOCS3	28002404, 28095459 BMI
cg10517290	CpG	17	76377967		PGS1
cg12818883	CpG	17	76437098		DNAH17
cg11202345	CpG	17	76976057	M9	LGALS3BP	28002404, 28095459, 29278407 BMI
cg04927537	CpG	17	76976091	M9	LGALS3BP	25935004, 28002404, 28095459, 29278407, 29762635 BMI, waist circumference
cg08515811	CpG	17	77921489		TBC1D16
cg18091083	CpG	17	78819092		RPTOR	28095459 BMI
cg20659057	CpG	17	79035418		BAIAP2
cg08111196	CpG	17	79899490		MYADML2
cg07157506	CpG	18	12883603		PTPN2
cg26713775	CpG	18	43685106		ATP5A1;HAUS1
rs4940757	SNP	18	56461646		ZNF532
rs10503052	SNP	18	58899633		CDH20
cg08554462	CpG	18	60986911		BCL2
cg17987358	CpG	18	74206810		NA
cg22345519	CpG	18	76766747		NA
cg05692899	CpG	18	77342368		NA
cg01403055	CpG	19	401992		NA
cg04583149	CpG	19	1207124		STK11
cg17805599	CpG	19	1619171		TCF3
cg15694117	CpG	19	2717422		DIRAS1
cg20149937	CpG	19	3465709		NA
cg13470920	CpG	19	6772831		VAV1
cg00340921	CpG	19	7600526	M12	PNPLA6
cg01630925	CpG	19	7615827	M12	PNPLA6
rs11669128	SNP	19	9601155		ZNF560
cg24319836	CpG	19	10213465		ANGPTL6
cg05323251	CpG	19	10449942		ICAM3
cg12169233	CpG	19	11959578		NA
cg00519069	CpG	19	14491737		CD97
cg18584265	CpG	19	15219983		SYDE1
rs11669445	SNP	19	16082245		OR10H4
cg07955752	CpG	19	30018436		VSTM2B
cg06880365	CpG	19	36870044		NA
cg26950531	CpG	19	38704515		DPF1	27826092, 28095459, 29278407, 31510868 BMI
cg22546859	CpG	19	39390528		NFKBIB;SIRT2
cg25999015	CpG	19	44037866		ZNF575
cg18723501	CpG	19	44506804		ZNF230
cg26470501	CpG	19	45252955		BCL3	28002404, 28095459, 29278407, 31510868 BMI
cg26619908	CpG	19	46580629		NA
cg05617973	CpG	19	49468917		FTL
cg04355077	CpG	19	50059946		NOSIP
cg27394057	CpG	19	54135129		DPRX
cg08704843	CpG	19	55919815		UBE2S
rs8108715	SNP	19	56984770	S30	ZNF667
rs7251105	SNP	19	56987172	S30	ZNF667
rs1035117	SNP	19	57161929		SMIM17
cg08106565	CpG	19	57185038		ZNF835
cg03218374	CpG	20	896981		ANGPT4	28095459, 29278407 BMI
cg02755603	CpG	20	18548475		LOC388789
cg03512414	CpG	20	19915874		RIN2
cg18457773	CpG	20	30865370		KIF3B
cg12099051	CpG	20	35580436		SAMHD1
cg06493829	CpG	20	39766765	M10	PLCG1
cg07893801	CpG	20	39767358	M10	PLCG1
cg06457011	CpG	20	39767490	M10	PLCG1
cg18062140	CpG	20	55967678		RBM38
rs6513302	SNP	20	56016512		RBM38
cg15457981	CpG	20	61447276		COL9A3
cg18611245	CpG	20	62338235		ZGPAT;ARFRP1
cg21870731	CpG	20	62496515		TPD52L2
rs2826064	SNP	21	21556446	S31	NCAM2
rs2826065	SNP	21	21556476	S31	NCAM2
rs2826415	SNP	21	22026652		NCAM2
cg09251111	CpG	21	38639846		DSCR3
cg27243685	CpG	21	43642366	M11	ABCG1	25935004, 26798409, 27826092, 28002404, 28095459 BMI, waist circumference, hypertriglyceridemic waist
cg01881899	CpG	21	43652704	M11	ABCG1	28002404, 28095459, 29278407 BMI
cg06500161	CpG	21	43656587	M11	ABCG1	25935004, 26119815, 26798409, 28002404, 28095459, 29099282, 29278407, 29762635, 31510868 BMI, waist circumference, hypertriglyceridemic waist
rs8134789	SNP	21	46619558		ADARB1
cg04595021	CpG	21	46716835		LOC642852
cg19148305	CpG	22	23802708		NA
cg25739715	CpG	22	30663881		OSM
rs2858753	SNP	22	32351105	S32	YWHAH
rs5998196	SNP	22	32355455	S32	C22orf24
cg04115025	CpG	22	32807879		C22orf28
rs978808	SNP	22	33171931	S33	SYN3
rs4821103	SNP	22	33172612	S33	SYN3
rs130535	SNP	22	33175471		SYN3
rs132643	SNP	22	36545570		APOL3
rs132648	SNP	22	36552402	S34	APOL3
rs4821460	SNP	22	36555472	S34	APOL3
cg22650271	CpG	22	39760165		SYNGR1	28002404, 28095459, 29278407 BMI
cg00058879	CpG	22	40082173		CACNA1I
rs133085	SNP	22	41096164		MCHR1
cg15143643	CpG	22	45897773		FBLN1
rs4823506	SNP	22	48265076		NA
Calories	Nutrient value
Animal fat	Nutrient value
Calcium	Nutrient value
Alcohol	Nutrient value
Sucrose	Nutrient value
Palmitoleic fatty acid	Nutrient value
Natural Food Folate, 2001	Nutrient value
Glucose	Nutrient value
Phenylalanine from aspartame	Nutrient value
Aspartic acid from aspartame	Nutrient value
Aspartame (2006)	Nutrient value
Hydroxyproline	Nutrient value
Quercetin, flavonol USDA 2003	Nutrient value
Myricetin, flavonol USDA 2003	Nutrient value
Isorhamnetin, flavonol USDA 2003	Nutrient value
total USDA flavonols (2007)	Nutrient value
Apigenin, flavone USDA 2003	Nutrient value
total USDA flavanone (2007)	Nutrient value
Catechin, flavan-3-ol USDA 2003	Nutrient value
Epicatechin, flavan-3-ol USDA 2003	Nutrient value
Malvidin, anthocyanidin USDA 2003	Nutrient value
Proanthocyanidin, monomers, USDA, 2007	Nutrient value
Proanthocyanidin, dimers, USDA, 2007	Nutrient value
Proanthocyanidin, 7-10mers, USDA, 2007	Nutrient value
Proanthocyanidin, polymers, USDA, 2007	Nutrient value
total theaflavin and polymers proanthocyanidins, USDA (2007)	Nutrient value
Total Usda Flavonoids, 2008	Nutrient value
Quercetin without supplements, flavonol USDA 2003	Nutrient value
Iceberg/Head lettuce	Food
Eggs	Food
Bacon	Food
Hot dogs	Food
Processed meats	Food
French fries	Food
Lo-cal Cola, no caffeine	Food
Lo-cal, non-Cola	Food
Red wine	Food
White wine	Food
Mayonnaise	Food
High-fat dairy servings	Food group
French fries servings	Food group
Egg servings	Food group
Processed Meat servings	Food group
Alcohol servings	Food group
Diet soda servings	Food group
Mediterranean Diet score (MDS)	Diet quality
Dietary Approaches to Stop Hypertension (DASH) diet score	Diet quality
drink_d_pwk	Lifestyle
Physical activity score (PAS)	Lifestyle
